# Supplementary material
Source: PubMed Central journal article supplement (PMC3037809)
Supplement: es102694h_si_001.pdf [file es102694h_si_001.pdf]

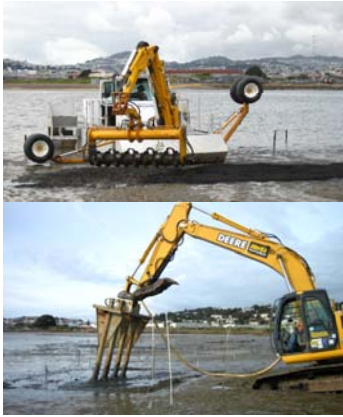

**a)** Application of activated carbon in a tidal mud-flat at Hunters Point Navy Shipyard, San Francisco Bay, CA using two application devices (2004 and 2006). The Aquamog (top) using a floating platform approached the site from water and used a rototiller arm while the slurry injection system (bottom) was land based and applied a carbon slurry directly into sediment.

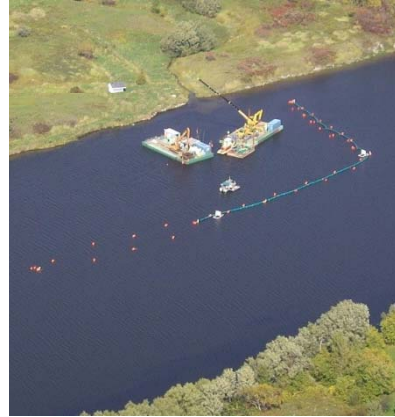

**b)** Application of activated carbon under 15 feet of water at Grasse River, NY, USA (2006). The site was enclosed with a silt curtain and application was performed using a barge mounted crane. Placement and mixing of the AC was achieved using two devices: 1) a 7-by-12-foot rototiller-type mixing unit; and 2) a 7-by-10-foot tine sled device.

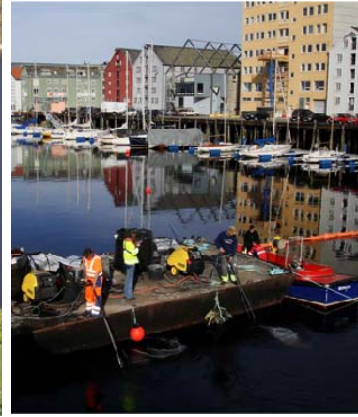

**c)** Application of activated carbon slurry directly onto sediments at Trondheim Harbor, Norway (2007). AC-salt water slurries with/without powdered bentonite clay were pumped 3-5 ft above the sediment bed under 20 ft of water. Part of the AC-only field was successfully covered with 5 mm sand to protect from erosion.

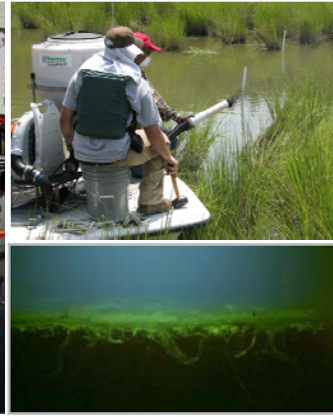

**d)** Application of activated carbon in a pelletized form (SediMite™) using an air blown dispersal device over a vegetated wetland impacted with PCBs near James River, VA, USA (2009). Picture below illustrates bioturbation induced breakdown and mixing of pelletized carbon with a fluorescent tag in a laboratory aquarium.

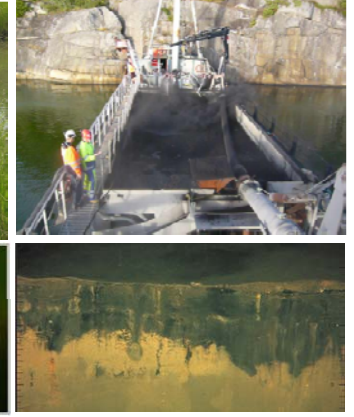

**e)** Application of AC-clay mixture at 100 and 300 ft depth, Grenlandsfjords, Norway (2009). A hopper dredger was used to pick up clean clay from an adjacent site. After AC-clay mixing, the trim pipe was deployed in reverse to place an AC-clay mixture on the sea floor. Sediment-profile imaging and sediment coring (bottom figure) showed that placement of an even active cap was successful.

Supplemental Figure S1. Descriptions of pilot-scale demonstrations of activated carbon amendment into sediment at five field sites.

Supplemental Table S1. Summary of activated carbon demonstration projects

| SITE LOCATION                                                       | Type of application                      | Funding                                                  | Application date     | Contaminants              | Points of Contact                                                                                 |
|---------------------------------------------------------------------|------------------------------------------|----------------------------------------------------------|----------------------|---------------------------|---------------------------------------------------------------------------------------------------|
| Hunters Point, CA<br>Site 1: tidal mudflat<br>Site 2: tidal mudflat | AC-mixed<br>AC-mixed                     | US Navy<br>NAVFAC                                        | Aug 2004<br>Jan 2006 | PCBs<br>PCBs              | luthy@stanford.edu                                                                                |
| Grasse River, NY:<br>River sediments                                | AC-mixed/<br>unmixed                     | Alcoa, EPA, DoD                                          | Sep, 2006            | PCBs                      | Larry.McShea@alcoa.com<br>ughosh@umbc.edu                                                         |
| Trondheim Harbor,<br>Norway:<br>Ocean harbor                        | AC-slurry<br>unmixed                     | Norwegian Res.<br>Council                                | May, 2007            | PCBs, PAHs,<br>PBDEs, DDT | <a href="mailto:Gerard.Cornelissen@ngi.no">Gerard.Cornelissen@ngi.no</a><br>Gijs.Breedveld@ngi.no |
| US Army Installation<br>in VA: Tidal creek &<br>marsh               | AC as<br>SediMite                        | SRP, NIEHS                                               | Aug 4-5,<br>2009     | PCBs                      | ughosh@umbc.edu<br>camenzie@exponent.com                                                          |
| Grenlandsfjords,<br>Norway: Ocean<br>harbor                         | Slurry of<br>native clean<br>clay and AC | Norwegian Res.<br>Council,<br>industry,<br>Norwegian EPA | Sep, 2009            | dioxins/furans            | Gerard.Cornelissen@ngi.no<br>Espen.eek@ngi.no<br>Morten.schaanning@niva.no                        |
| Aberdeen Proving<br>Ground, MD: Tidal<br>creek & marsh              | AC as<br>SediMite                        | DoD-ESTCP                                                | Dec 2010             | Hg, Me-Hg,<br>PCBs, DDT   | camenzie@exponent.com<br>ughosh@umbc.edu                                                          |
